# Supplementary material
Source: PubMed Central journal article supplement (PMC6125184)

## **Supplementary Materials**

### **Supplementary Methods**

#### **Participating Transplant Centers**

Dana-Farber Cancer Institute, Boston Children's Hospital and Massachusetts General Hospital (Partners Harvard Cancer Care) (protocol 05030); Children's Hospital Los Angeles, Los Angeles (05-00079); University of Florida Shands Hospital (117-2009) and MD Anderson Cancer Center (2005-0695).

#### **Phenotyping of DLI before and after alloanergization**

Fresh donor PBMC were phenotyped before and after alloanergization by multiparameter flow cytometry. Cells were stained for CD69-FITC, CD25-FITC or -PE, CD4-PE-Cy5, CD8-PE-Cy7, CD3-APC, CD28-FITC, CD278 (ICOS)-PE, CD152 (CTLA4)-PE-Cy5, CD30-FITC, CD70-PE, CD154 (CD40L)-PE-Cy5, CD279 (PD1)-FITC, CD272 (BTLA)-PE, CD127-PE, CD45RA-PE and CD62L-PE-Cy5 and acquired on a BD FACSAria. Viability was assessed by propidium iodide (PI) uptake and PI-positive events were excluded. Compensation controls were single fluorochrome-labelled Compbeads and cells (where appropriate). Isotype controls were used for negative staining controls.

#### **Phenotyping of patient peripheral blood for T-cell subsets**

PBMC from patient peripheral blood were phenotyped for T-cell subset markers by flow cytometry. Cells were stained with CD3-ECD, CD4- or CD8-PE-Cy7 and acquired on an FC500 (Beckman Coulter). For naive and memory cell phenotyping cells were additionally stained with CD45RA-PE and CD62L-PE-Cy7. Compensation controls were single fluorochrome-labelled Compbeads (BD) and cells (where appropriate). Isotype controls were used for negative staining controls.

#### **Intracellular cytokine flow cytometry for viral- and WT1- specific T cells**

Donor and patient PBMC were stimulated with CMV-, adenovirus- (adeno 6) (both Microbix) or VZV- (ABI) infected human foreskin fibroblast lysates or overlapping WT1-derived peptide pools (JPT technology) for 12 hours in the presence of anti-CD28 (Immunotech, Fullerton, CA) and Brefeldin A (Sigma Aldrich, SA). Positive and

negative controls were Staphylococcal Enterotoxin B (SA) and mock-infected cell lysate/ no peptides respectively. After 12 hours, cells were washed and stained with CD3-ECD, CD4-PE-Cy5, CD8-PE-Cy7 (all Beckman-Coulter), fixed, permeabilized and stained with PE- or FITC-conjugated IFN- $\gamma$  (BD). The percentage of IFN- $\gamma$ <sup>+</sup> virus-specific CD4<sup>+</sup> and CD8<sup>+</sup> T-cells was calculated as (percentage of IFN- $\gamma$ <sup>+</sup> T-cells after virus lysate stimulation – percentage seen in negative controls) and expressed as the proportion of the CD4<sup>+</sup> and CD8<sup>+</sup> T-cells. A minimum of 50 IFN- $\gamma$ <sup>+</sup> events above those seen in negative controls were acquired to give an assay CV of 15% or less.

**Table S1 Patients, donors, HLA-mismatches and conditioning**

| Patient Number | Age (years) | Diagnosis/status pre-HSCT | HSC Donor and age (years) | HLA-mismatch (HvG/GvH) | Conditioning |
|----------------|-------------|---------------------------|---------------------------|------------------------|--------------|
| 001            | 7           | AML-IF-CR1                | Father, 39                | 5 Ag/5Ag               | TBI          |
| 002            | 41          | MDS-IPSS INT2             | Sister, 40                | 4Ag/4Ag                | TBI          |
| 003            | 47          | Ph+-ALL-CR2               | Son, 22                   | 4Ag/5Ag                | TBI          |
| 004            | 14          | AML-CR2                   | Sister, 19                | 4Ag/0Ag                | TBI          |
| 005            | 2           | AML-CR2                   | Mother, 43                | 4Ag/5Ag                | MEL          |
| 010            | 25          | AML-IF                    | Father, 50                | 5Ag/5Ag                | MEL          |
| 012            | 22          | AML-CR2                   | Sister, 25                | 3Ag/2Ag                | MEL          |
| 013            | 26          | AML-CR1                   | Brother, 23               | 2Ag/2Ag                | MEL          |
| 015            | 49          | MDS-IPSS high             | Half-brother, 56          | 4Ag/5Ag                | MEL          |
| 016            | 50          | AML-CR2                   | Daughter, 33              | 2Ag/2Ag                | MEL          |
| 018            | 7           | AML-CR1                   | Mother, 39                | 2Ag/3Ag                | TBI          |
| 023            | 46          | AML-CR2                   | Daughter, 21              | 2 Ag/4Ag               | MEL          |
| 025            | 24          | ALL-CR2                   | Mother, 56                | 5Ag/5Ag                | MEL          |
| 026            | 42          | AML-CR2                   | Brother, 38               | 5Ag/5Ag                | MEL          |
| 027            | 29          | ALL-CR2                   | Sister, 34                | 5Ag/5Ag                | TBI          |
| 028            | 36          | MDS/INT1                  | Brother, 46               | 5Ag/4Ag                | MEL          |
| 030            | 50          | AML-IF                    | Brother, 48               | 5Ag/5Ag                | MEL          |
| 033            | 17          | ALL-IF CR1                | Father, 40                | 5Ag/5Ag                | TBI          |
| 035            | 37          | AML-CR1                   | Brother, 34               | 5Ag/5Ag                | TBI          |

AML, acute myeloid leukemia; IF, induction failure; CR, complete remission; MDS, myelodysplasia; IPSS, international prognostic scoring system; INT1, intermediate -1, INT2, intermediate-2; Ph+, Philadelphia chromosome; ALL, acute lymphoblastic leukemia; ag, antigen; MEL, melphalan/, thiotepa/fludarabine/anti-thymocyte globulin/methylprednisolone ; TBI, total body irradiation/ thiotepa/fludarabine/anti-thymocyte globulin/methylprednisolone

**Table S2 Cell doses in stem cell transplant, engraftment and chimerism**

| Patient Number | CD34+ cell dose (x 10 <sup>6</sup> /kg) | CD3+ cell dose (x 10 <sup>6</sup> /kg) | Neutrophil engraftment | Chimerism %/day first measured |
|----------------|-----------------------------------------|----------------------------------------|------------------------|--------------------------------|
| 001            | 17.42                                   | 2.67                                   | 19                     | 100/D+25                       |
| 002            | 6.02                                    | 2                                      | 10                     | 100/D+40                       |
| 003            | 10.4                                    | 2                                      | 10                     | 100/D+27                       |
| 004            | 11.04                                   | 0                                      | 17                     | 100/D+27                       |
| 005            | 7.57                                    | 2                                      | 17                     | 99/D+32                        |
| 010            | 8.82                                    | 2                                      | 12                     | 100/D+29                       |
| 012            | 6.81                                    | 0.40                                   | 11                     | 100/D+30                       |
| 013            | 17.54                                   | 1                                      | 9                      | 99/D+30                        |
| 015            | 7.30                                    | 3                                      | 11                     | >98/D+28                       |
| 016            | 9.4                                     | 1                                      | 9                      | 100/D+28                       |
| 018            | 14.4                                    | 2.6                                    | 12                     | 100/D+17                       |
| 023            | 7.8                                     | 2.6                                    | 9                      | >98/D+28                       |
| 025            | 8.36                                    | 1                                      | 10                     | 100/D+30                       |
| 026            | 9.2                                     | NA                                     | 14                     | 100/D+31                       |
| 027            | 15.15                                   | 1.15                                   | 12                     | >98/D+25                       |
| 028            | 5.17                                    | 2.79                                   | N/A*                   | Not done                       |
| 030            | 16.5                                    | 2.34                                   | 8                      | >98/D+ 18                      |
| 033            | 10.8                                    | 2.98                                   | 16                     | 100/D+26                       |
| 035            | 11.31                                   | 1.06                                   | 14                     | 100/D+26                       |

\*autologous reconstitution

**Table S3 ADLI dose and timing and allostimulator source**

| Patient Number | aDLI dose CD3 <sup>+</sup> cells/kg | Stimulator Donor | Time of aDLI infusion |
|----------------|-------------------------------------|------------------|-----------------------|
| 001            | 10 <sup>3</sup>                     | Mother           | D+35                  |
| 002            | 10 <sup>3</sup>                     | Father           | D+35                  |
| 003            | 10 <sup>3</sup>                     | Son              | D+35                  |
| 004            | 10 <sup>3</sup>                     | Patient          | D+42                  |
| 005            | 10 <sup>4</sup>                     | Father           | D+42                  |
| 010            | 10 <sup>4</sup>                     | Patient          | D+34                  |
| 012            | 10 <sup>4</sup>                     | Mother           | D+35                  |
| 013            | None given <sup>†</sup>             | -                | -                     |
| 015            | 10 <sup>5</sup>                     | Patient          | D+36                  |
| 016            | 10 <sup>5</sup>                     | Son              | D+35                  |
| 018            | 10 <sup>5</sup>                     | Father           | D+35                  |
| 023            | 10 <sup>5</sup>                     | Patient          | D+35                  |
| 025            | None given <sup>§</sup>             | -                | -                     |
| 026            | 10 <sup>4</sup>                     | Patient          | D+35                  |
| 027            | 10 <sup>4</sup>                     | Patient          | D+42                  |
| 028            | None Given <sup>  </sup>            | -                | -                     |
| 030            | 10 <sup>4</sup>                     | Cousin           | D+42                  |
| 033            | 10 <sup>4</sup>                     | Mother           | D+35                  |
| 035            | 10 <sup>4</sup>                     | Mother           | D+35                  |

† died D+32 of bacterial sepsis prior to infusion of aDLI. § Donor not able to donate.  
|| non-engraftment followed by autologous reconstitution.

**Table S4 Patient outcomes**

| Patient Number | aDLI dose CD3 <sup>+</sup> cells/kg | Relapse | Overall survival    | Cause of Death             |
|----------------|-------------------------------------|---------|---------------------|----------------------------|
| 001            | 10 <sup>3</sup>                     | No      | Died D+78           | Pulmonary VOD              |
| 002            | 10 <sup>3</sup>                     | No      | Died D+738          | Bleeding post liver biopsy |
| 003            | 10 <sup>3</sup>                     | No      | Died D+59           | Respiratory Failure        |
| 004            | 10 <sup>3</sup>                     | No      | Alive<br>5.8 years* |                            |
| 005            | 10 <sup>4</sup>                     | No      | Alive<br>9.3 years  |                            |
| 010            | 10 <sup>4</sup>                     | D+180   | Died D+473          | Disease                    |
| 012            | 10 <sup>4</sup>                     | D+150   | Died D+361          | Disease                    |
| 013            | None given                          | No      | Died D+32           | Sepsis                     |
| 015            | 10 <sup>5</sup>                     | No      | Alive<br>9 years    |                            |
| 016            | 10 <sup>5</sup>                     | No      | Died D+264          | Respiratory failure        |
| 018            | 10 <sup>5</sup>                     | No      | Alive<br>8.9 years  |                            |
| 023            | 10 <sup>5</sup>                     | No      | Died D+118          | Adenovirus                 |
| 025            | None given                          | No      | N/E                 |                            |
| 026            | 10 <sup>4</sup>                     | No      | Died D+78           | Acute GvHD                 |
| 027            | 10 <sup>4</sup>                     | No      | Died D+313          | Respiratory Failure        |
| 028            | None Given                          | No      | N/E                 |                            |
| 030            | 10 <sup>4</sup>                     | No      | Died D+152          | Respiratory Failure        |
| 033            | 10 <sup>4</sup>                     | No      | Died D+321          | Sepsis                     |
| 035            | 10 <sup>4</sup>                     | No      | Died D=99           | Respiratory Failure        |

\* lost to follow up at this point

### **Figure S1 Schema for clinical study**

Schematic design of clinical study of delayed infusion of alloenergized donor lymphocyte infusion after CD34-selected haploidentical haematopoietic stem cell transplantation. Pre-transplant conditioning was either TBI-based (TBI 200cGy bid D-11 to D-9, Fludarabine 40mg/m<sup>2</sup> D-7 to D-3, Thiotepa 5 mg/kg D-8 to D-7) or chemotherapy-based (Melphalan 140mg/m<sup>2</sup> D-8 only, Fludarabine 40mg/m<sup>2</sup> D-6 to D-3, Thiotepa 10 mg/kg D-7 only). All patients received rabbit ATG (Sangstat) 1.5 mg/kg/day from D-6 to D-3. GCSF; Granulocyte colony stimulating factor; PBMC, peripheral blood mononuclear cells; TBI, total body irradiation; ATG, anti-thymocyte globulin; GvHD, graft-versus-host disease.

### **Figure S2 Alloenergization efficiency of DLI by centre and by dose level**

(A) Efficiency of alloenergization of DLI is shown according to clinical centre. There was no significant differences between centres. (B) Efficiency of alloenergization of DLI is shown according to dose level. There was no significant differences between dose levels.

### **Figure S3 Residual alloreactivity in aDLI and occurrence of acute GvHD after T-cell depleted haploidentical HSCT and aDLI**

Median residual alloreactivity in aDLI was higher in patients who went on to develop acute GvHD although this did not reach statistical significance (median 35% versus 20%, p=0.15). Horizontal lines are medians.

### **Figure S4 Phenotype of CD4<sup>+</sup> regulatory T-cell (Treg) in patient peripheral blood after T-cell depleted haploidentical HSCT and aDLI**

CD4<sup>+</sup> Treg were identified phenotypically as CD25<sup>+</sup>CD127<sup>lo</sup> cells (upper left panel). 90% of these cells were FOXP3<sup>+</sup> (upper middle panel) whereas only 1% of

CD4<sup>+</sup>CD25<sup>-</sup> cells were FOXP3<sup>+</sup> (upper right panel). Similarly, 80% of CD4<sup>+</sup>FOXP3<sup>+</sup> cells (lower left panel) were CD25<sup>+</sup>CD127<sup>lo</sup> (lower middle panel) whereas only 1% of CD4<sup>+</sup>FOXP3<sup>-</sup> cells were CD25<sup>+</sup>CD127<sup>lo</sup> (lower right panel). Representative dot plots from the peripheral blood of P02016 at D +90 after haploidentical HSCT at aDLI (at D+35) are shown.



Figure S1

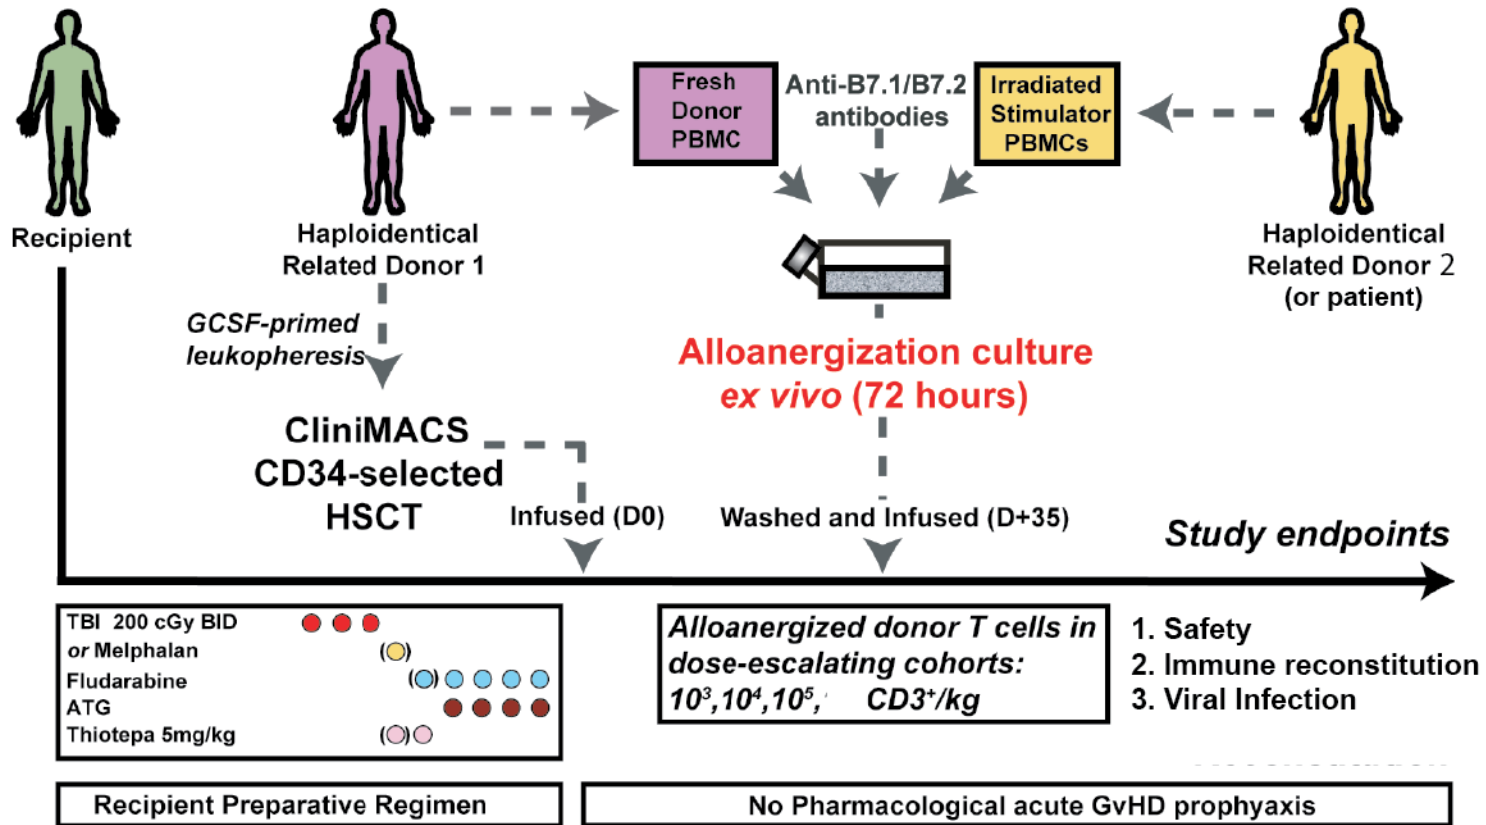

Figure S2

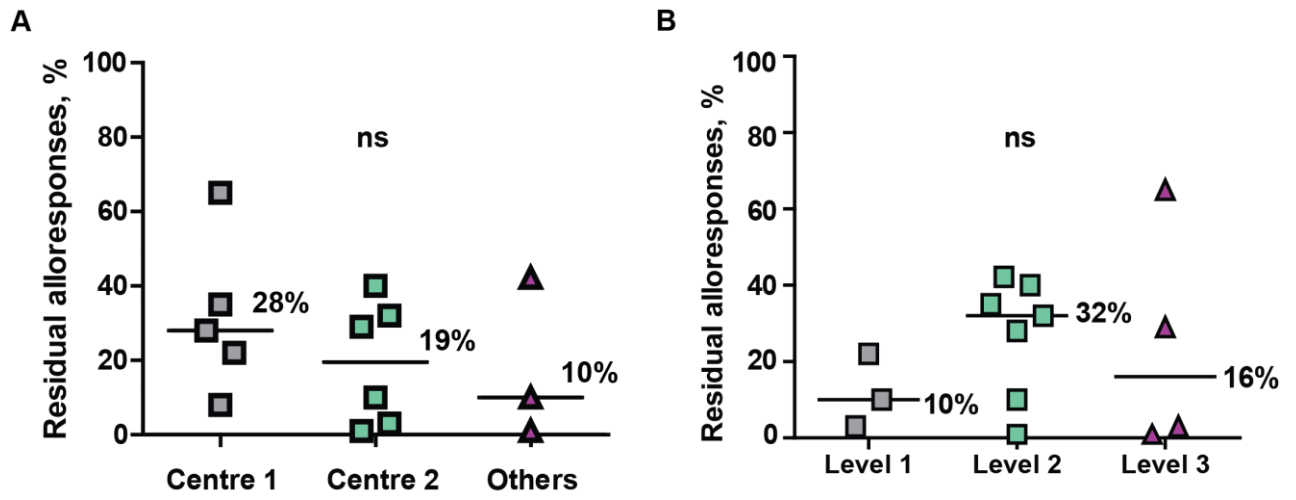

Figure S3

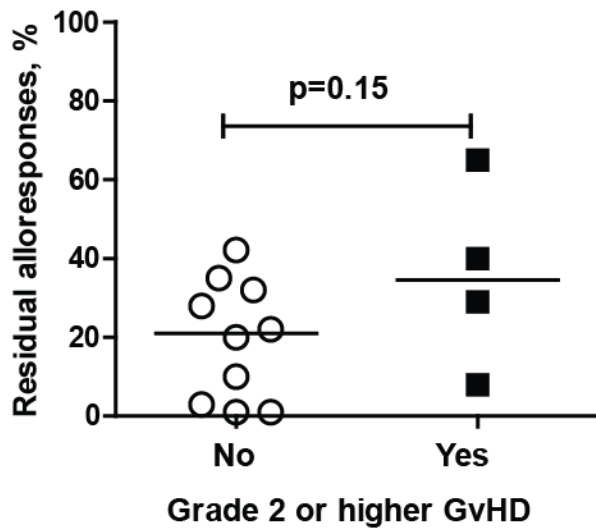

Figure S4

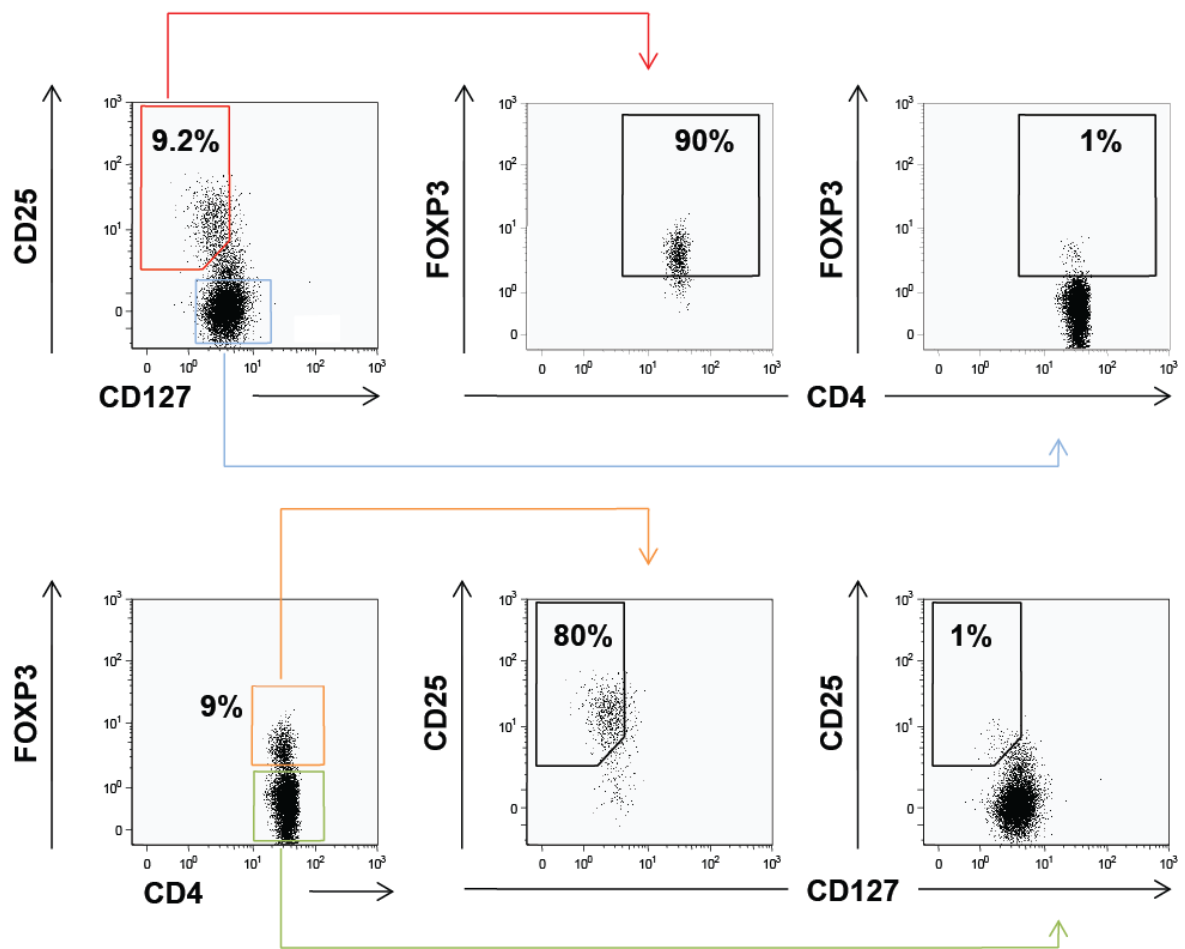

Supplement: NIHMS968656-supplement-1.pdf [file NIHMS968656-supplement-1.pdf]
